# Supplementary material for: An acetylene black modified gel polymer electrolyte for high-performance lithium–sulfur batteries
Source: Royal Society of Chemistry journal article supplement (doi:10.1039/c9ta03123e), 2019-01-01
Supplement: c9ta03123e1.pdf [file c9ta03123e1.pdf]

Electronic Supporting Information

**An acetylene black modified gel polymer electrolyte for high performance lithium-sulfur batteries**

Dezhi Yang <sup>a,b</sup>, Liang He <sup>a,b</sup>, Yu Liu <sup>a,b</sup>, Wenqi Yan <sup>a</sup>, Shishuo Liang <sup>a</sup>, Yusong Zhu<sup>\*,a</sup>,  
Lijun Fu<sup>\* a</sup>, Yuhui Chen <sup>a</sup>, Yuping Wu<sup>\* a,b,c</sup>

<sup>a</sup> State Key Laboratory of Materials-oriented Chemical Engineering & School of Energy Science and Engineering, Nanjing Tech University, Nanjing 211816, China

<sup>b</sup> Institute of Advanced Materials (IAM), Nanjing Tech University, Nanjing 210009, China

<sup>c</sup> DKJ New Energy Tech Co., Ltd., Shaoxing, Zhejiang, China

Corresponding Authors

E-mail: zhuys@njtech.edu.cn; l.fu@njtech.edu.cn; wuyp@fudan.edu.cn

Table S1. EIS fitting parameters of the Li-S batteries assembled with (a) CGPE and (b) LE after different cycles at 1C.

| (a) CGPE        |               |                   |                  |
|-----------------|---------------|-------------------|------------------|
|                 | $R_b(\Omega)$ | $R_{SEI}(\Omega)$ | $R_{CT}(\Omega)$ |
| Initial         | 1.955         | 13.31             | 38.46            |
| After 10 cycles | 1.767         | 10.40             | 5.207            |
| After 50 cycles | 1.726         | 10.06             | 5.526            |
| (b) LE          |               |                   |                  |
|                 | $R_b(\Omega)$ | $R_{SEI}(\Omega)$ | $R_{CT}(\Omega)$ |
| Initial         | 1.522         | 72.67             | 19.49            |
| After 10 cycles | 3.490         | 62.28             | 30.24            |
| After 50 cycles | 4.676         | 30.15             | 70.48            |

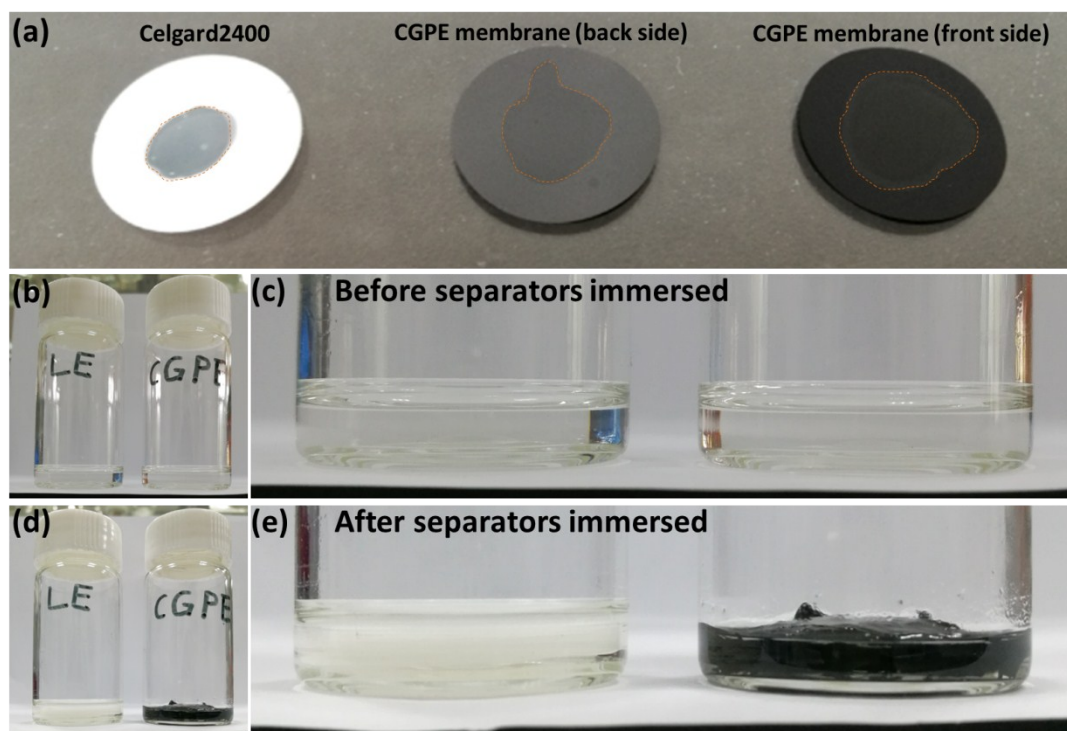

Fig. S1. (a) The photographs of the liquid electrolyte wettability of Celgard2400 and CGPE membrane; (b, c, d and e) observation of the liquid electrolyte uptake ability of the Celgard2400 and CGPE membrane by immersing 0.15 g of Celgard2400 and CGPE membrane into 1ml of liquid electrolyte and putting them standing for 12 h.

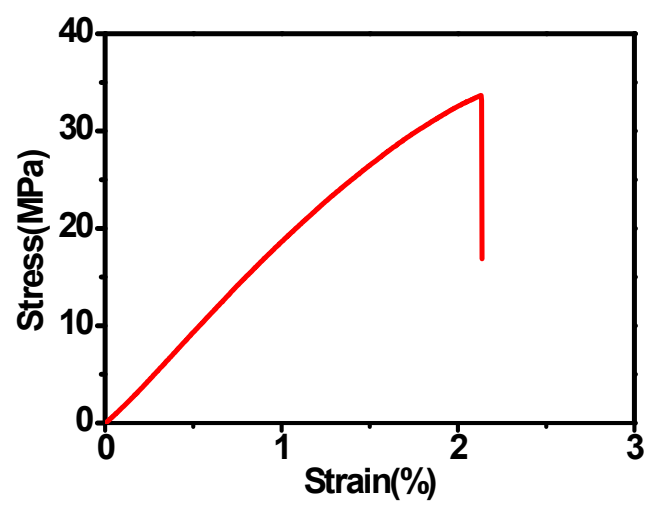

Fig. S2. The stress-strain curve of the CGPE membrane.

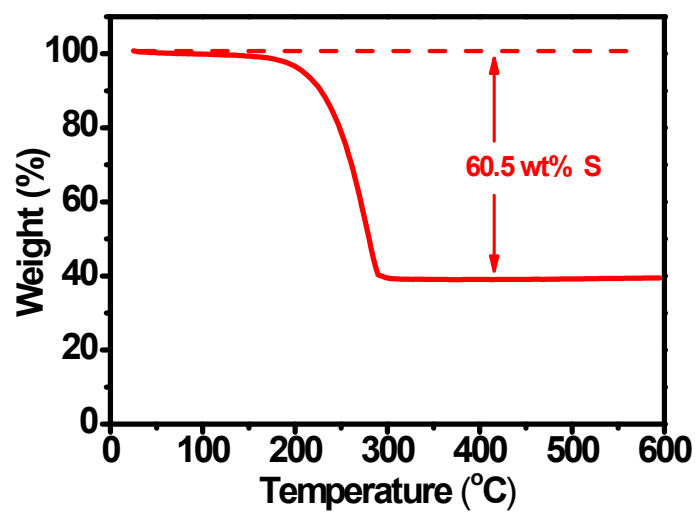

Fig. S3. TG curves of the prepared S-CNTs.

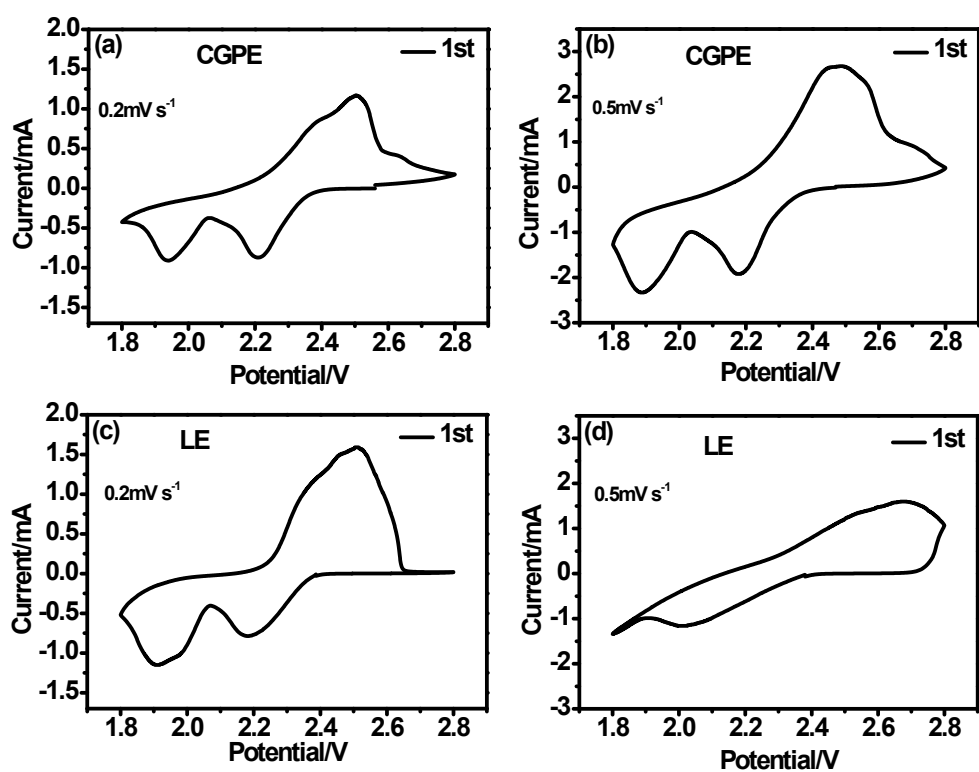

Fig. S4. Cyclic voltammograms of the Li-S batteries assembled with (a, b) CGPE at the scan rate of 0.2 mV s<sup>-1</sup> and 0.5 mV s<sup>-1</sup>; (c, d) LE at the scan rate of 0.2 mV s<sup>-1</sup> and 0.5 mV s<sup>-1</sup>.

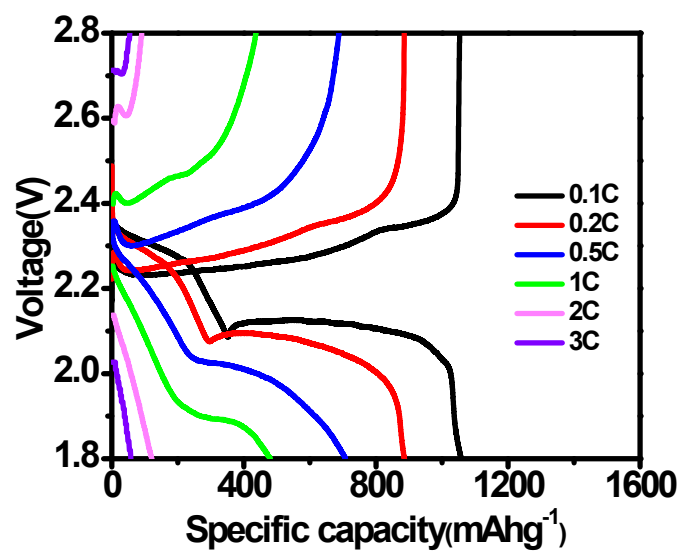

Fig. S5. Discharge/charge profiles of the Li-S batteries assembled with LE at different current densities.

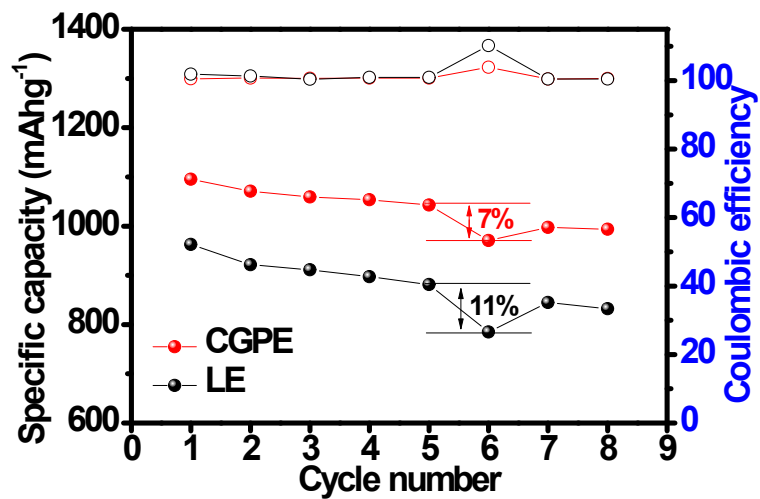

Fig. S6. Cycling performance of the Li-S batteries assembled with CGPE and LE at 0.2C, in which the resting time between the fifth cycle and sixth cycle was 24 h.

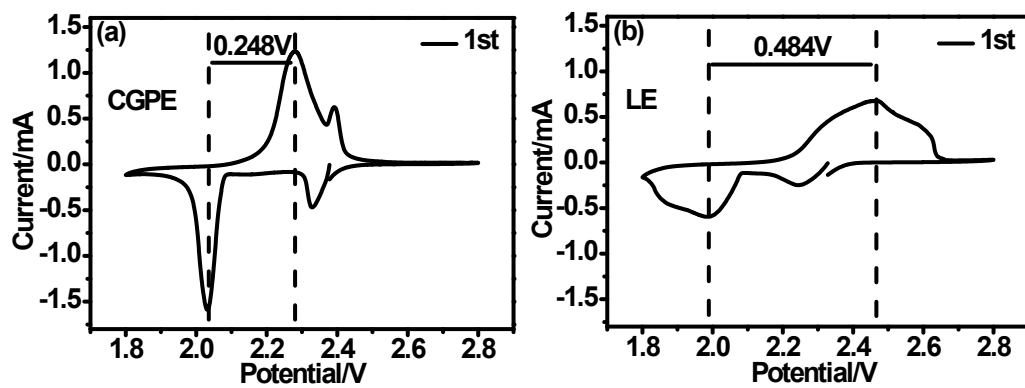

Fig. S7. Cyclic voltammograms of the Li-S batteries assembled with (a) CGPE and (b) LE at a scan rate of  $0.1 \text{ mV s}^{-1}$ , with the condition that the tested batteries were cycled at 1C for 50 times beforehand.

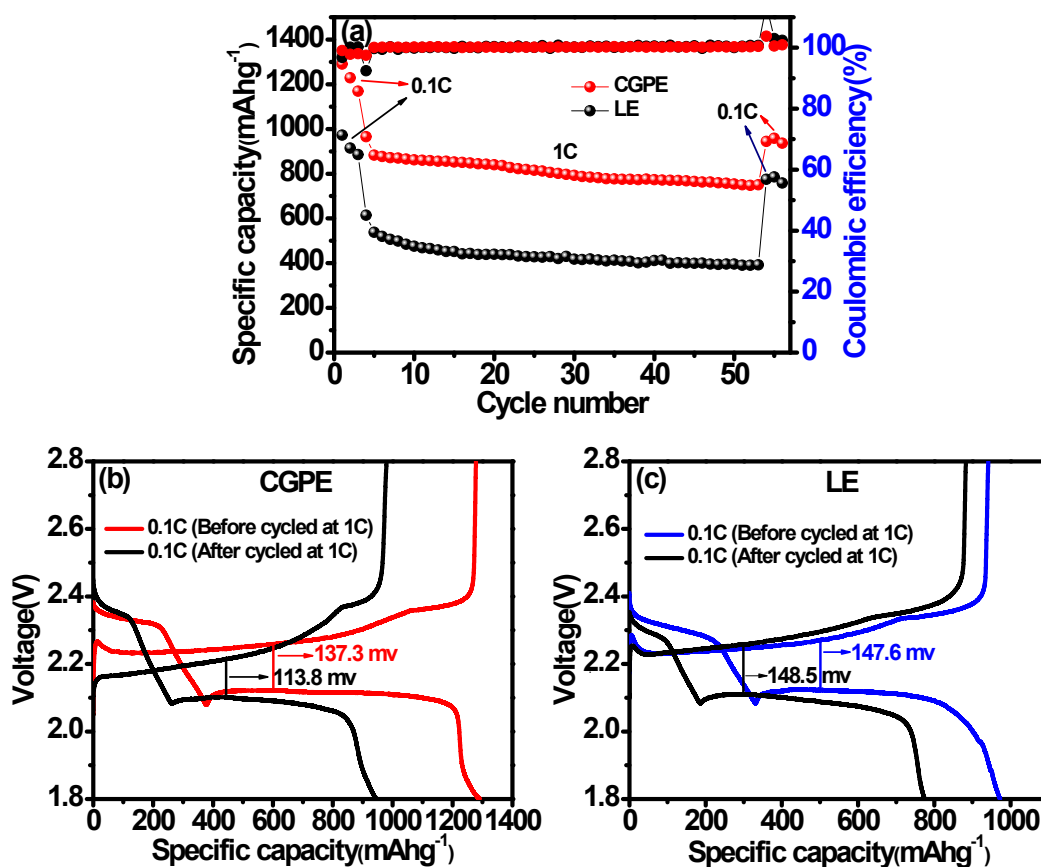

Fig. S8. (a) Cycling performance of the Li-S batteries assembled with CGPE and LE at different current densities (0.1C, 1C, 0.1C); (b) discharge/charge profiles of the first cycle at 0.1C before and after 1C rate for the Li-S batteries equipped with CGPE; (c) discharge/charge profiles of the first cycle at 0.1C before and after 1C rate for the Li-S batteries equipped with LE.

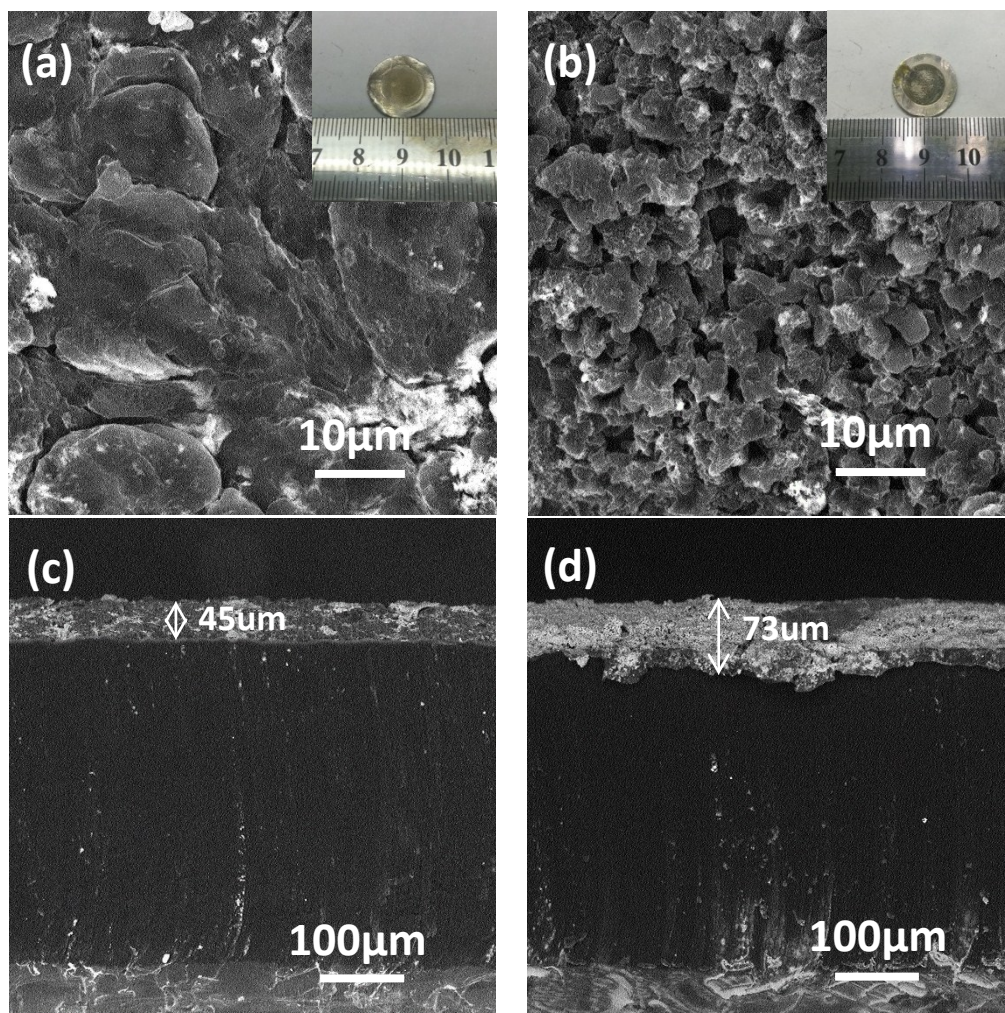

Fig. S9. Surface SEM images of the cycled lithium anodes and their corresponding cross-sectional morphology for Li-S batteries assembled with (a, c) CGPE and (b, d) LE.

Table S2. A comparison in rate performance of this work to other previous reports.

|                  | GPE materials                            | S loading<br>(mg cm <sup>-2</sup> ) | Rate<br>(1C=1675<br>mA g <sup>-1</sup> ) | Capacity<br>(mAh g <sup>-1</sup> ) |
|------------------|------------------------------------------|-------------------------------------|------------------------------------------|------------------------------------|
| <b>This work</b> | <b>PMMA/Acetylene black</b>              | <b>1.0-1.3</b>                      | <b>3 C</b>                               | <b>657</b>                         |
| [22]             | Carbon<br>black/Nonwoven/PEG-PPG-<br>PEG | 1.5                                 | 3 C                                      | 641                                |
| [23]             | PETEA                                    | 1.0-1.2                             | 1 C                                      | 325                                |
| [42]             | PVDF-HFP/PETT-Ester                      | 1.2                                 | 2 C                                      | 243                                |
| [43]             | PVDF-HFP/CNF                             | 1.7                                 | 2 C                                      | < 600                              |
| [44]             | PVDF-HFP/LATP                            | 1.7-2                               | 0.2 C                                    | 459                                |
| [45]             | ETPTA/CNF                                | 1                                   | 2 C                                      | 330                                |
| [46]             | PMMA/PAN                                 | 1.5-1.8                             | 3 C                                      | 645                                |
| [47]             | Lignocellulose                           | -                                   | 0.19 C                                   | < 600                              |
| [48]             | PVDF/CNF                                 | 1.18                                | 2 C                                      | 500                                |
| [49]             | PEO/LiTFSI                               | -                                   | 1 C                                      | 554                                |
